# Supplementary material for: Microwave-assisted synthesis of cyclen functional carbon dots to construct a ratiometric fluorescent probe for tetracycline detection
Source: Royal Society of Chemistry journal article supplement (doi:10.1039/c8tc02982b), 2018-01-01
Supplement: c8tc02982b1.pdf [file c8tc02982b1.pdf]

## Electronic Supplementary Information

### Microwave synthesis of cyclen functional carbon dots to construct ratiometric fluorescent probe for tetracycline detection

Zhi Shen,<sup>ab</sup> Cheng Zhang,<sup>\*a</sup> Xinling Yu,<sup>a</sup> Jian Li,<sup>a</sup> Zhenyang Wang<sup>a</sup>,  
Zhongping Zhang<sup>a</sup> and Bianhua Liu<sup>\*a</sup>

<sup>a</sup> Institute of Intelligent Machines, Chinese Academy of Sciences, Hefei, Anhui 230031, China.

<sup>b</sup> School of Physics and Materials Science, Anhui University, Hefei, Anhui 230601, China.

\*Corresponding author E-mail: czhang@iim.ac.cn; bhliu@iim.ac.cn

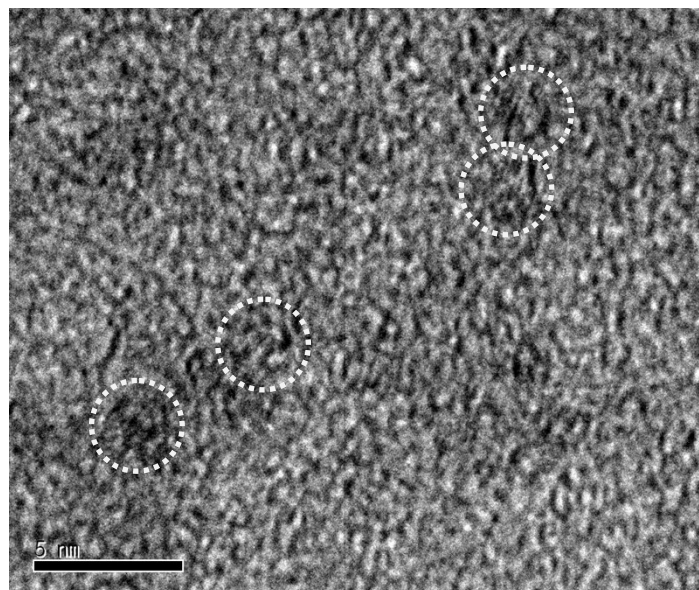

**Figure S1.** HR-TEM image of the as-synthesized CDs. Some CDs showed the lattice fringes, indicating the carbonization and crystallization of precursor.

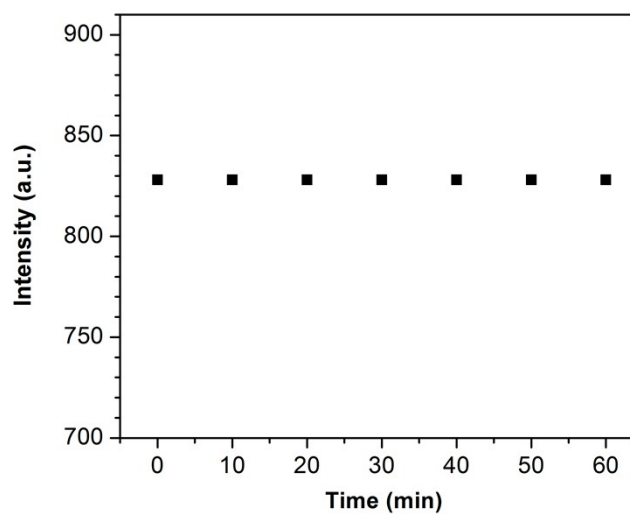

**Figure S2.** Time course of the CDs fluorescence intensity change under the air and sunlight condition within 60 min.

**Table S1.** Quantum yields of fluorescent carbon dots obtained by different reaction conditions.

| NO. | CDs from different reaction ratios |                    |                | Reaction conditions | QY (%) | Photos                                                                                |
|-----|------------------------------------|--------------------|----------------|---------------------|--------|---------------------------------------------------------------------------------------|
| 1   | Citric acid<br>0.1921 g            | Cyclen<br>0.0172 g | Water<br>10 mL | 750 W<br>5 min      | ---    | No Fluorescence                                                                       |
| 2   | Citric acid<br>0.1921 g            | Cyclen<br>0.0342 g | Water<br>10 mL | 750 W<br>5 min      | 2.5    | 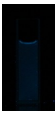   |
| 3   | Citric acid<br>0.1921 g            | Cyclen<br>0.0860 g | Water<br>10 mL | 750 W<br>5 min      | 7.4    | 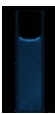   |
| 4   | Citric acid<br>0.1921 g            | Cyclen<br>0.1723 g | Water<br>10 mL | 750 W<br>5 min      | 27.6   | 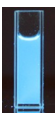   |
| 5   | Citric acid<br>0.1921 g            | Cyclen<br>0.3446 g | Water<br>10 mL | 750 W<br>5 min      | 20.1   | 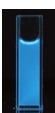  |
| 6   | Citric acid<br>0.1921 g            | Cyclen<br>0.8615 g | Water<br>10 mL | 750 W<br>5 min      | 12.8   | 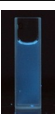 |
| 7   | Citric acid<br>0.1921 g            | Cyclen<br>1.7230 g | Water<br>10 mL | 750 W<br>5 min      | 4.6    | 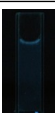 |
| 8   | ---                                | Cyclen<br>1.7230 g | Water<br>10 mL | 750 W<br>5 min      | ---    | No Fluorescence                                                                       |

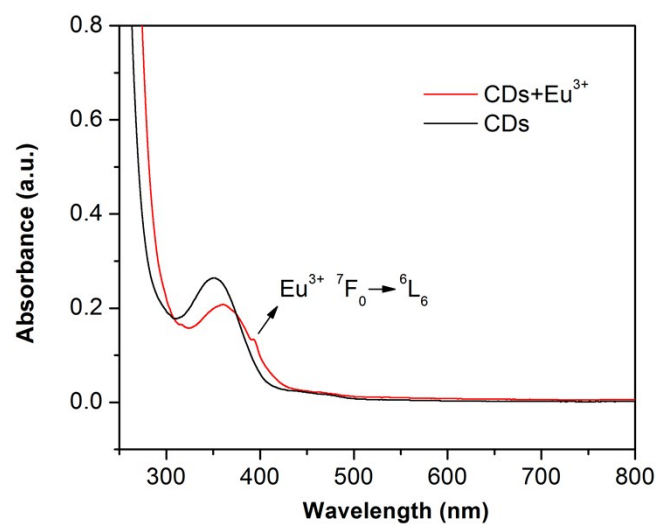

**Figure S3.** The UV-vis absorption spectra of CDs and CDs-Eu<sup>3+</sup>.

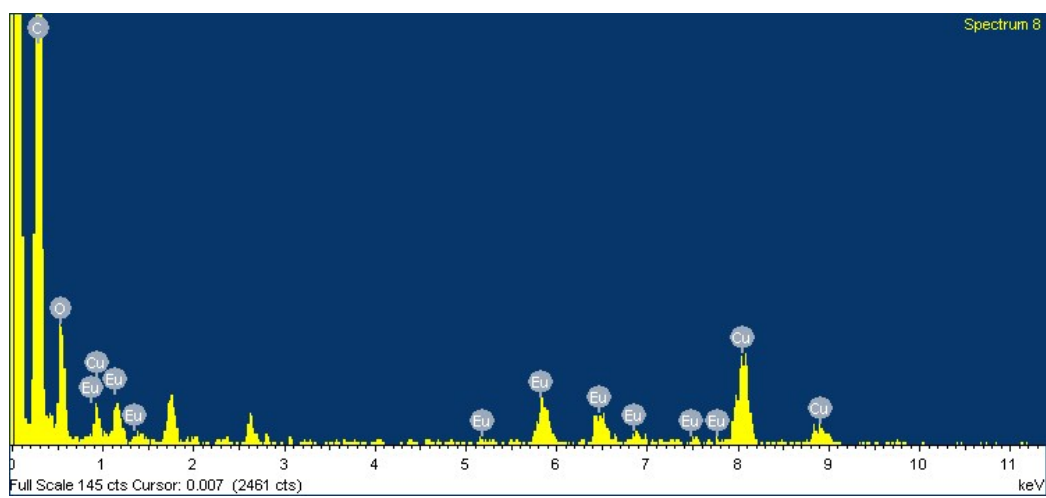

**Figure S4.** The energy-dispersive X-ray spectrum of the as-prepared probe confirms the presence of Eu<sup>3+</sup> on the surface of CDs.

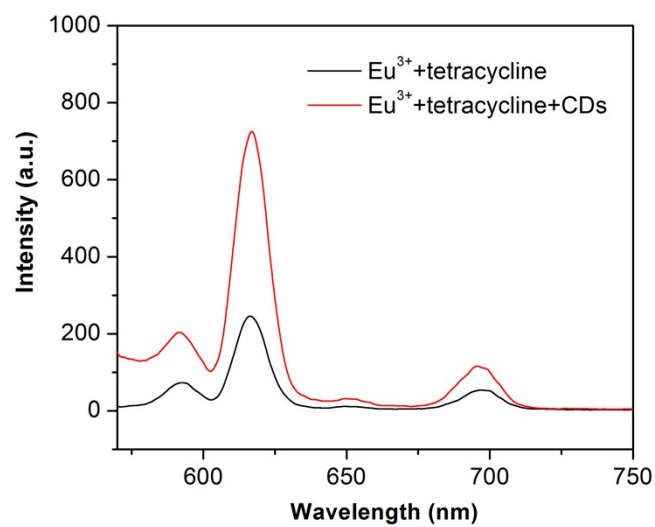

**Figure S5.** The fluorescent spectra of TC-Eu<sup>3+</sup> in the presence (red line) and absence (black line) of cyclen functional CDs.

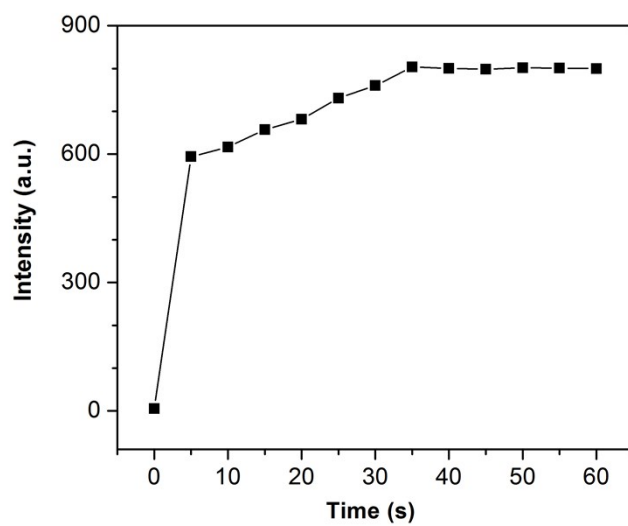

**Figure S6.** Time course of the fluorescence intensity change at 616 nm upon the addition of 3 µg/mL tetracycline.

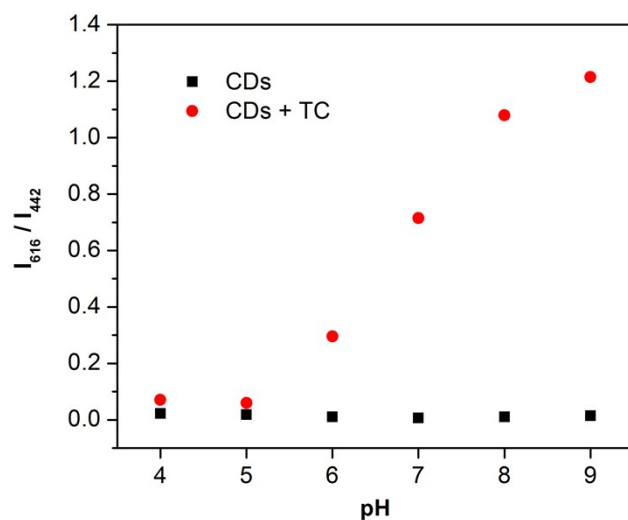

**Figure S7.** Effect of pH on the fluorescence intensity ratio ( $I_{616}/I_{442}$ ) of the CDs- $\text{Eu}^{3+}$  probe in the absence (black) and presence (red) of 3  $\mu\text{g/mL}$  tetracycline.

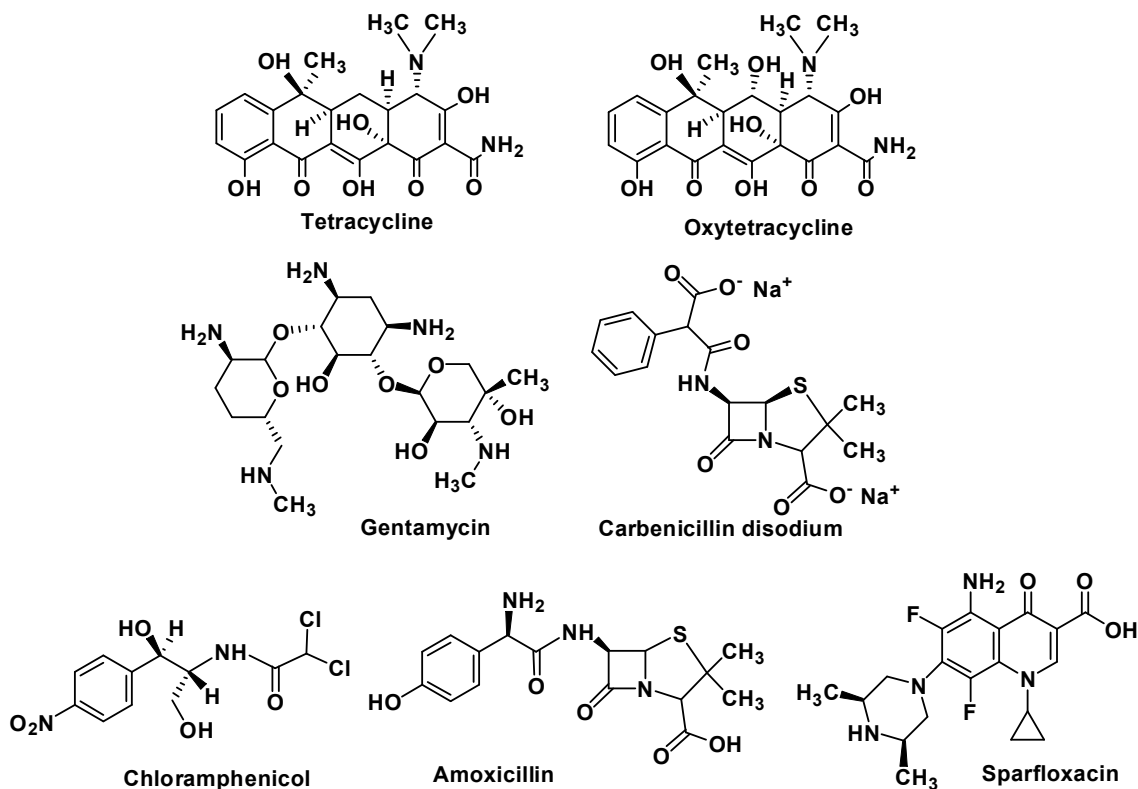

**Figure S8.** Chemical structure of typical antibiotics for selectivity detection.

**Table S2.** Determination of tetracycline in tap water and lake water samples.

| Spiked<br>concentration<br>( $\mu\text{g/mL}$ ) | Tap water                     |                 | Lake water                    |                 |
|-------------------------------------------------|-------------------------------|-----------------|-------------------------------|-----------------|
|                                                 | Found<br>( $\mu\text{g/mL}$ ) | Recovery<br>(%) | Found<br>( $\mu\text{g/mL}$ ) | Recovery<br>(%) |
| 0.5                                             | 0.542                         | 108.4           | 0.536                         | 107.2           |
| 1.0                                             | 1.128                         | 112.8           | 1.168                         | 116.8           |
| 2.0                                             | 2.165                         | 108.3           | 2.046                         | 102.3           |
